# Supplementary material for: Nodal signaling is required for mesodermal and ventral but not for dorsal fates in the indirect developing hemichordate, Ptychodera flava
Source: PubMed Central journal article supplement (PMC4571091; doi:10.1242/bio.011809), 2015-05-15
Supplement: supp_bio.011809_BIO011809supp.pdf [file supp_bio.011809_BIO011809supp.pdf]

### Phylogenetic trees

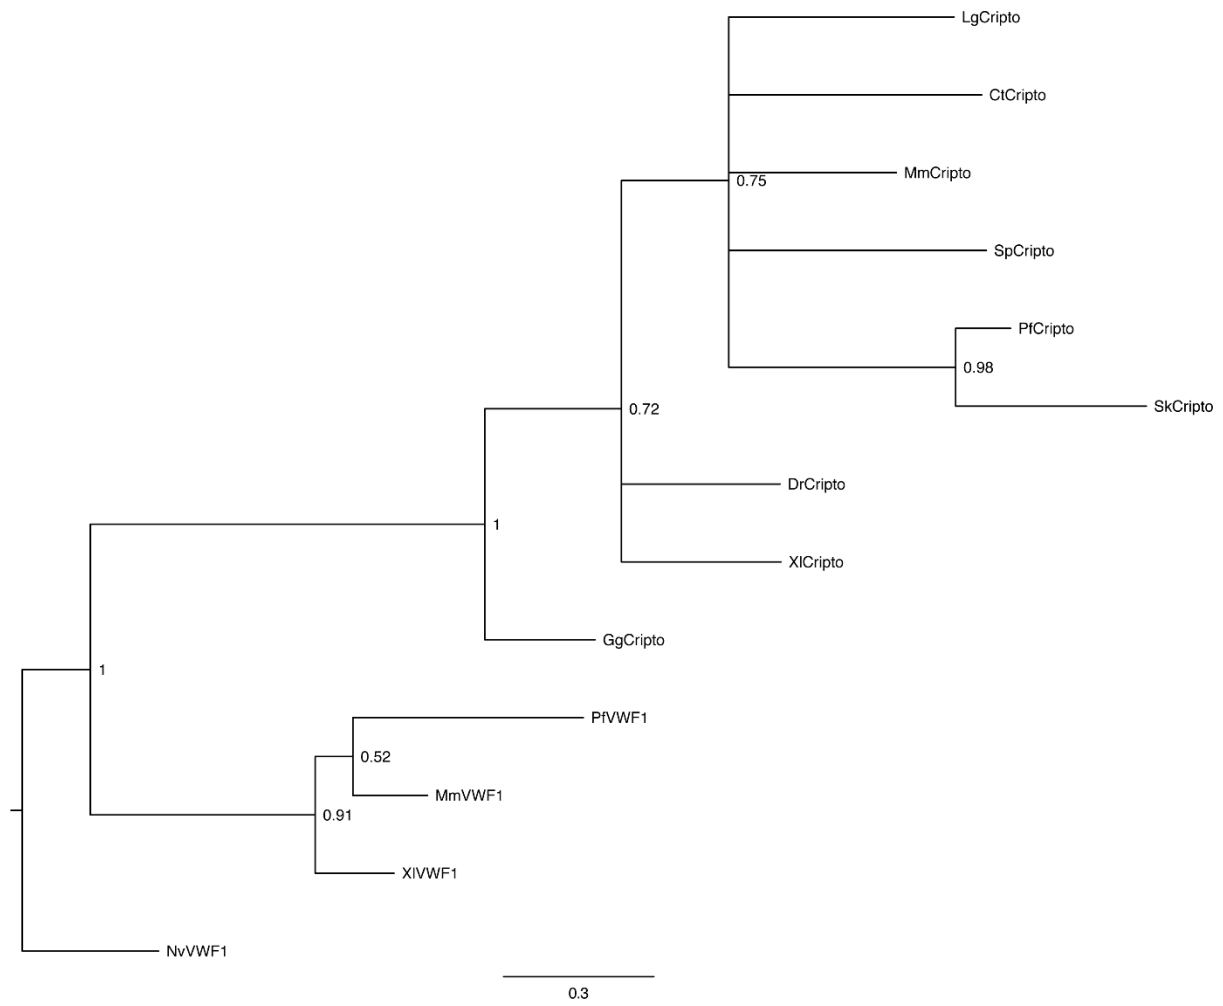

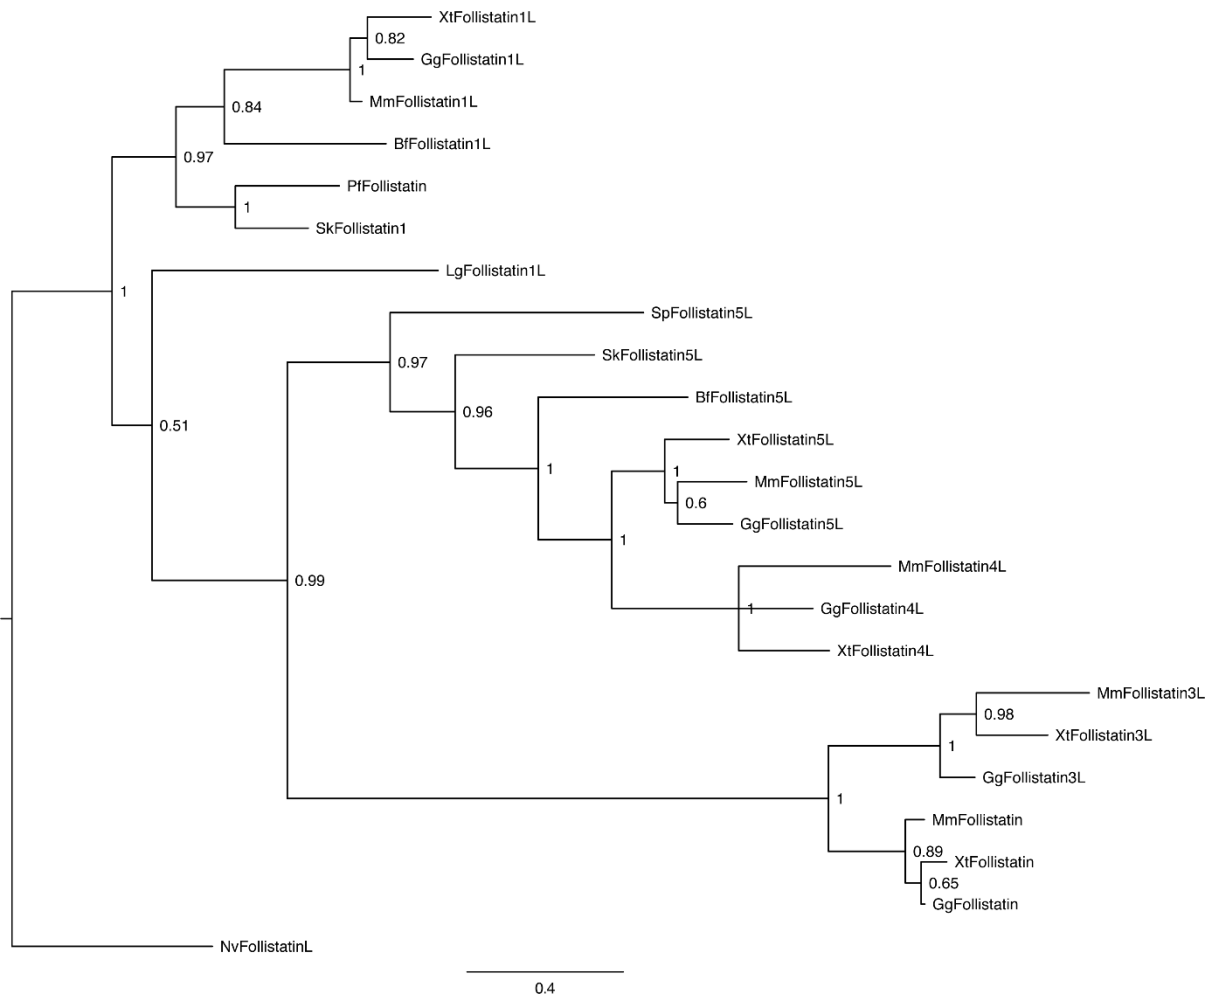

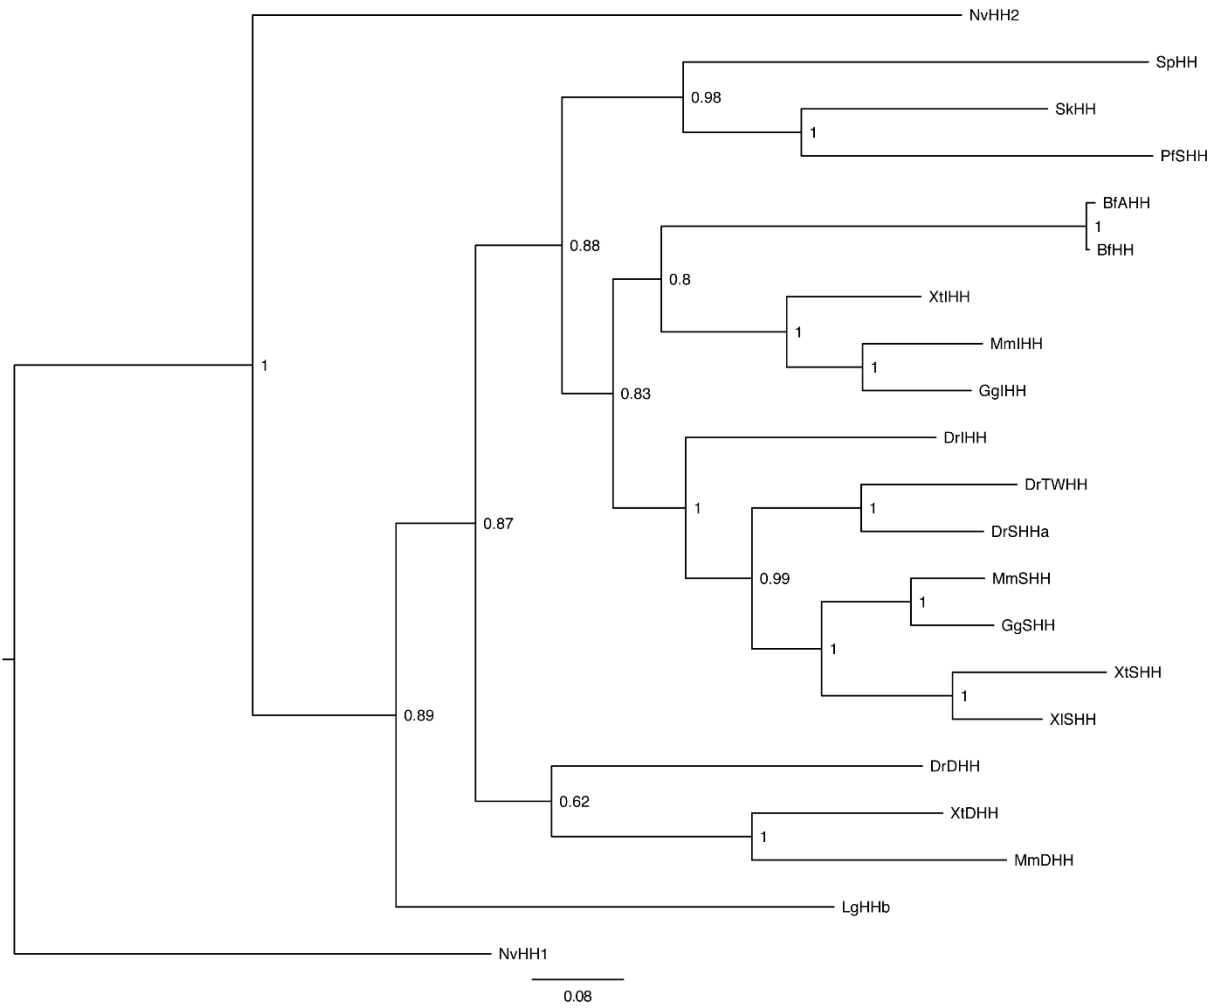

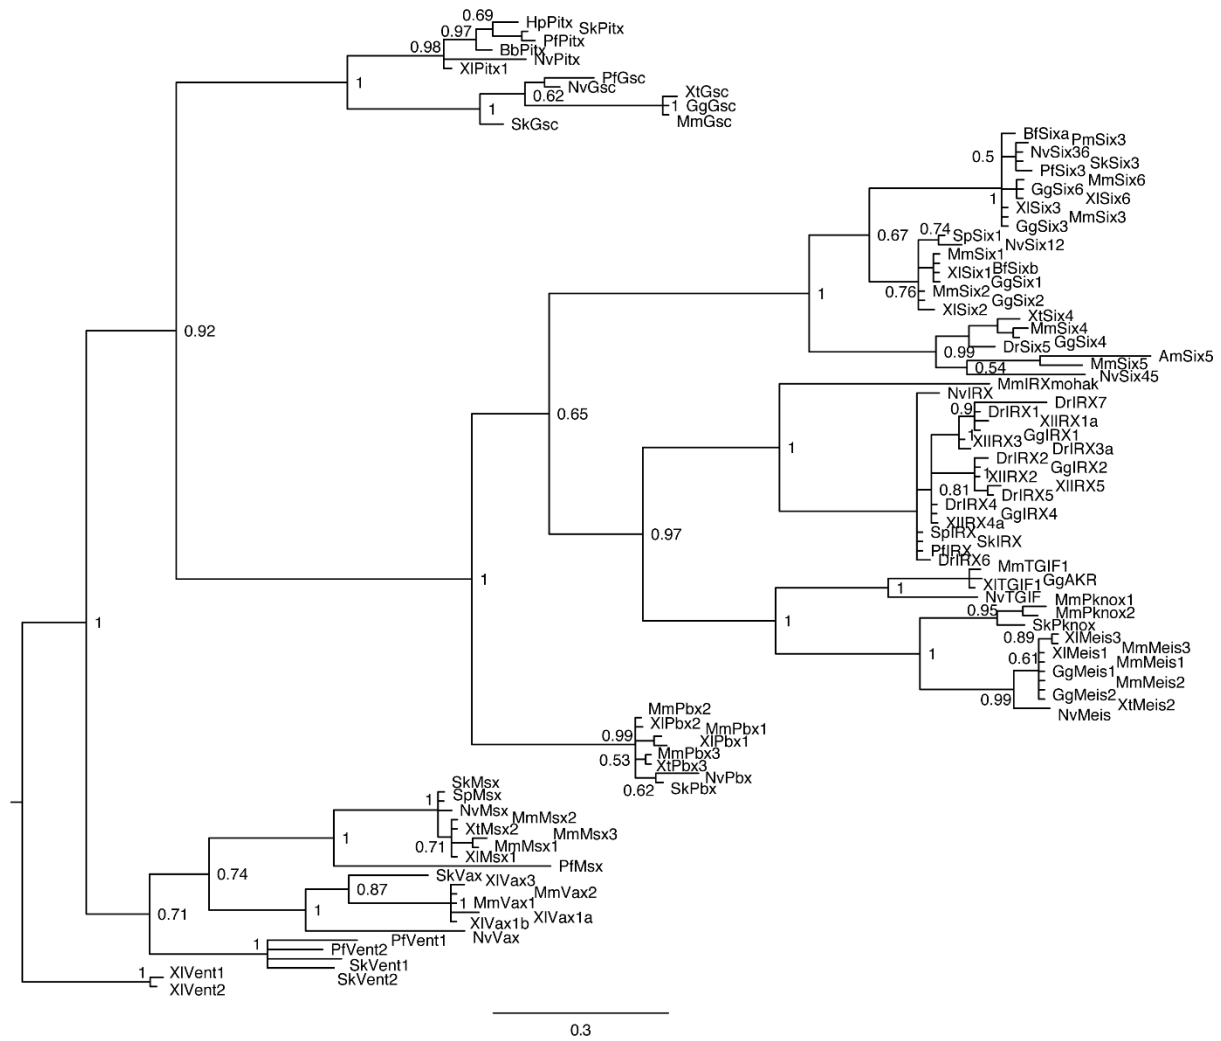

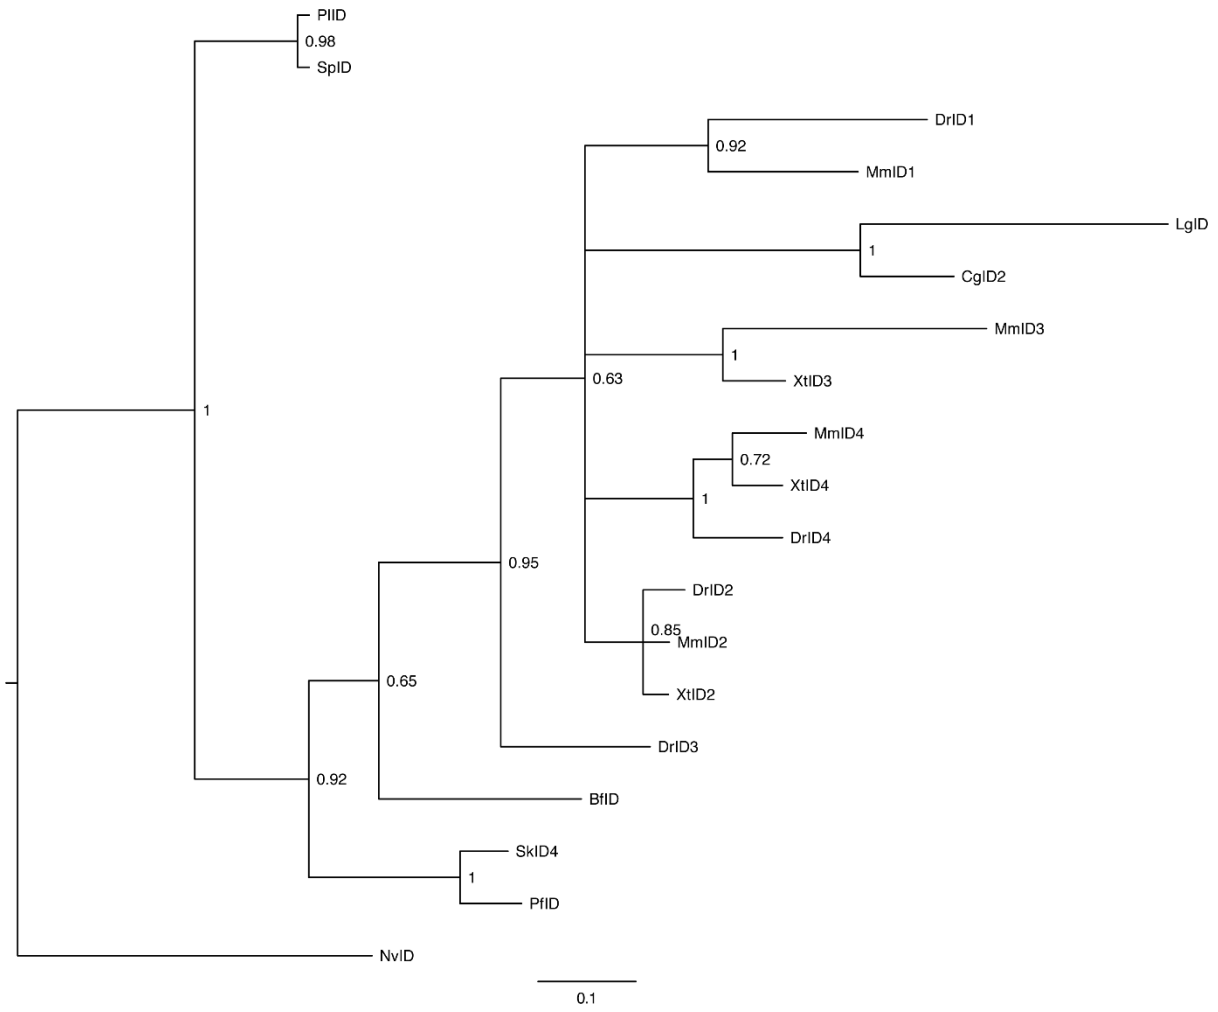

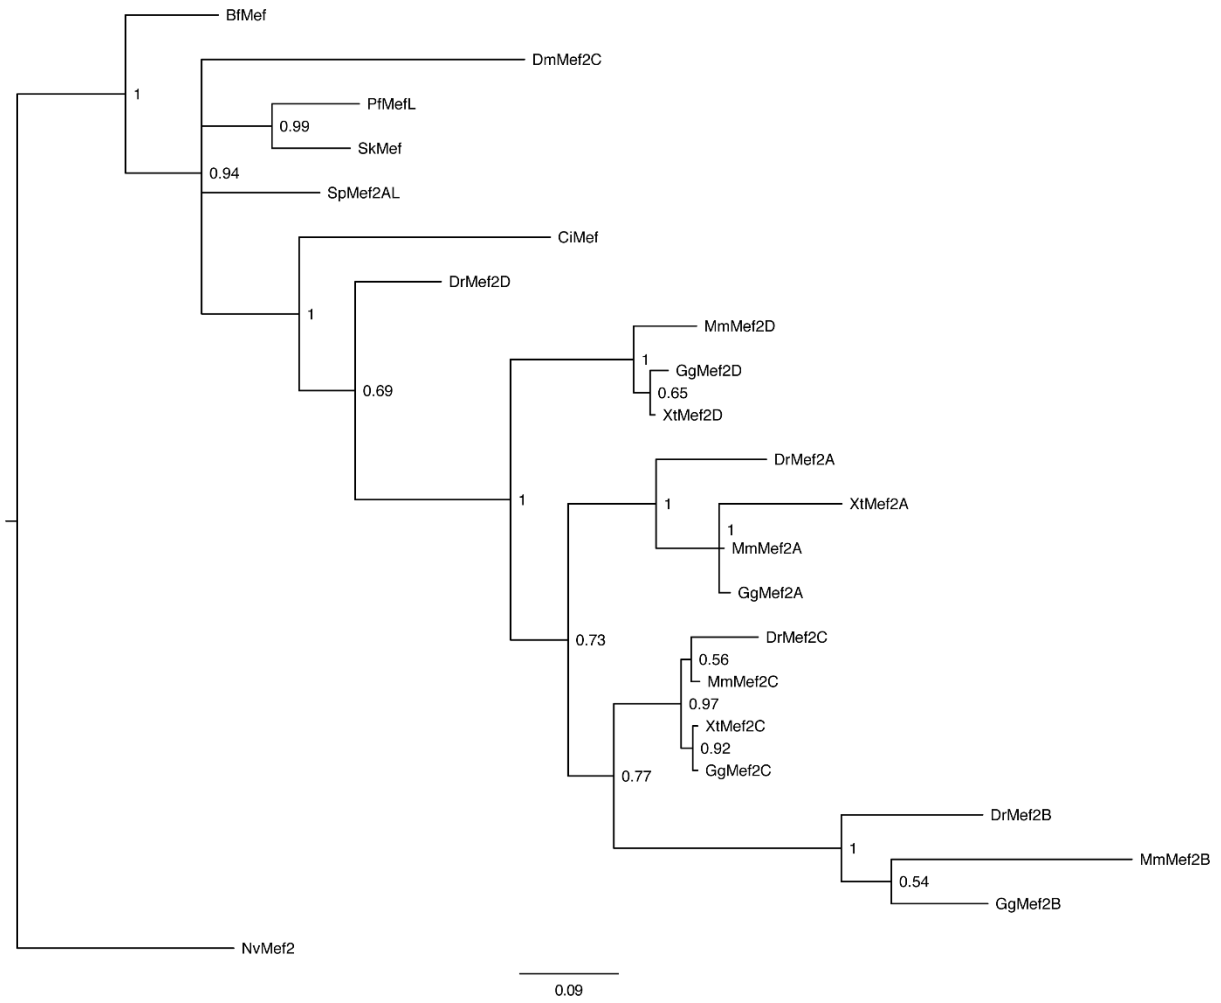

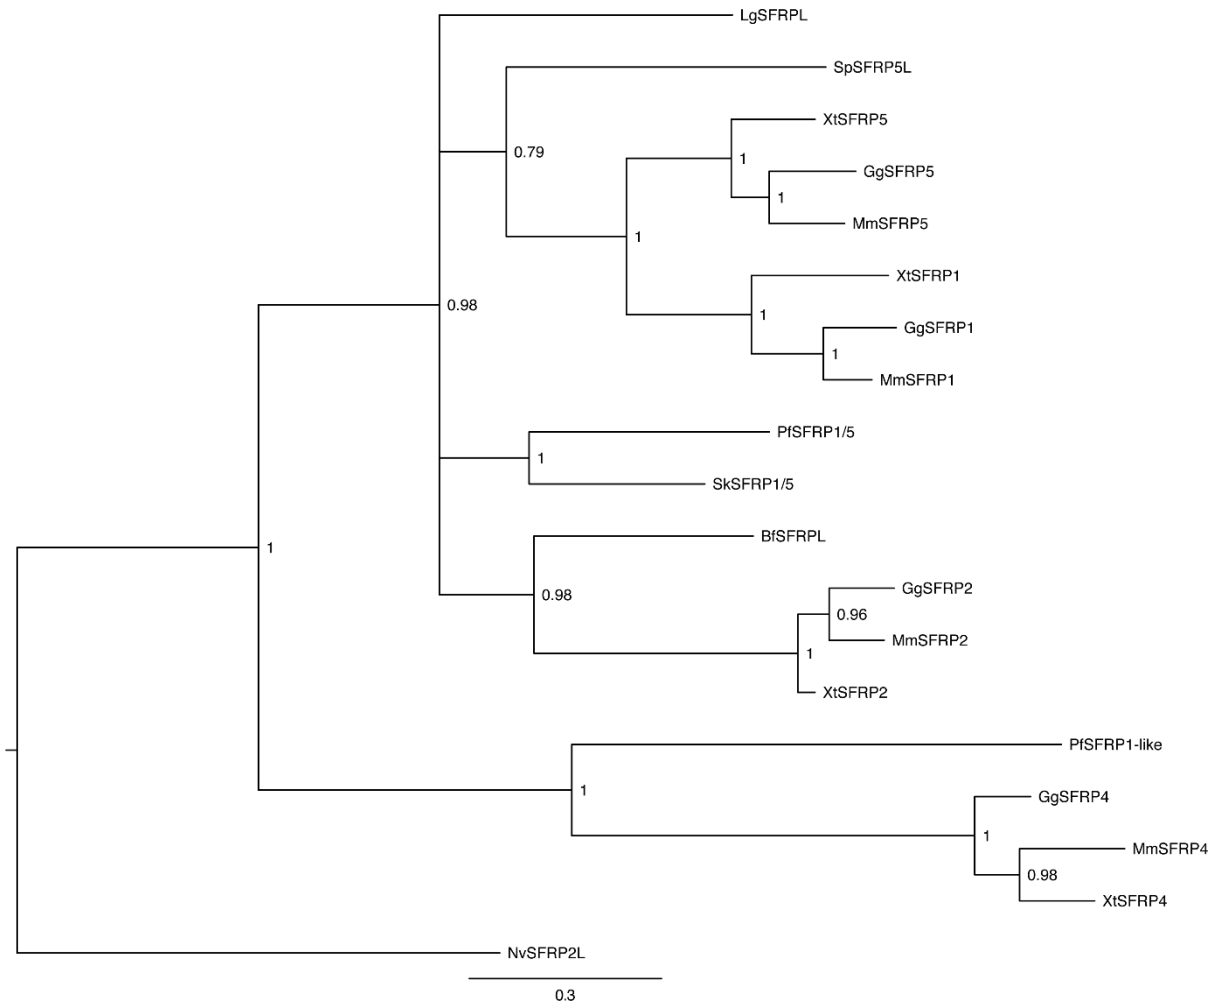

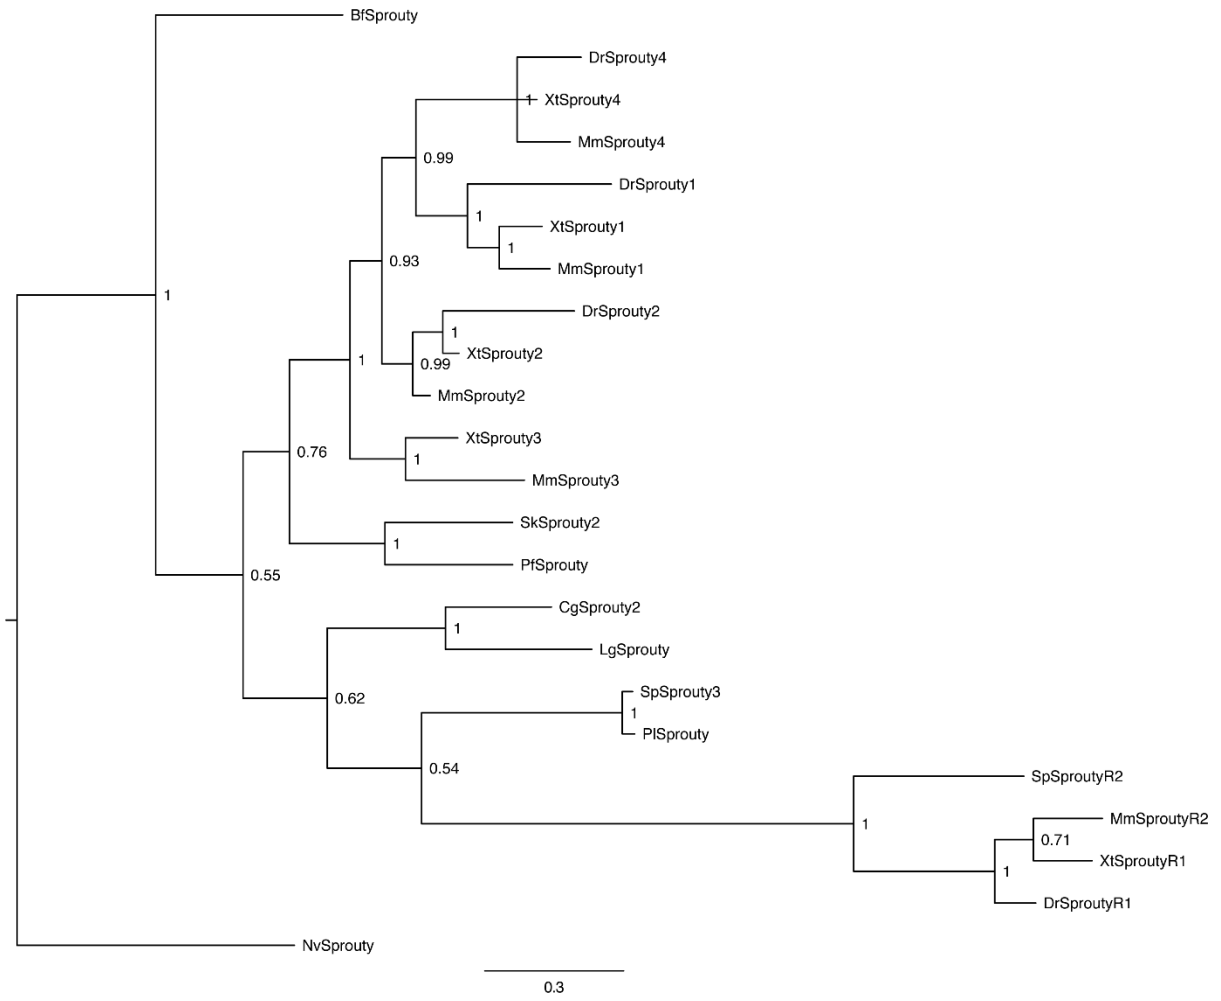





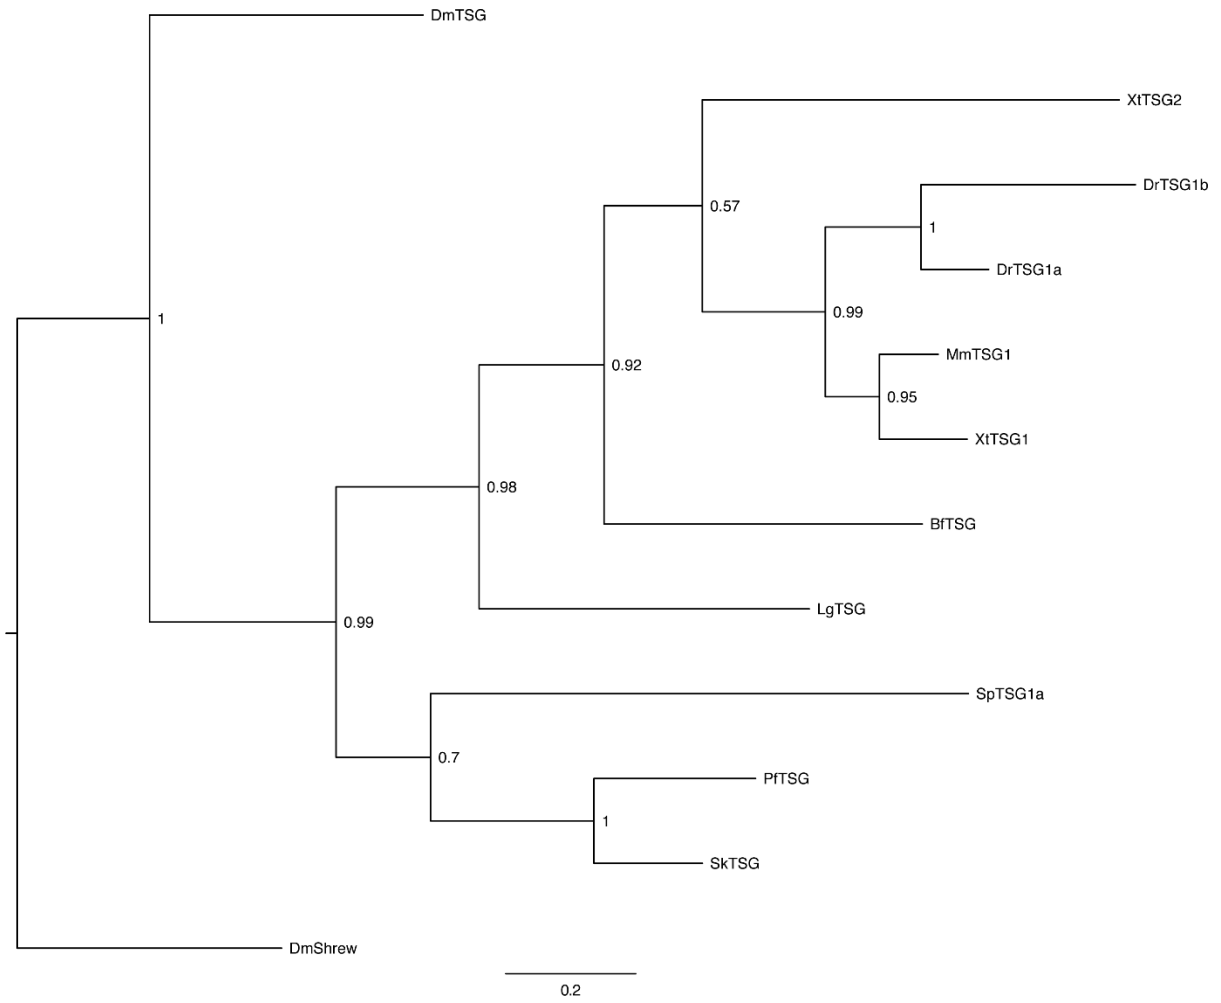

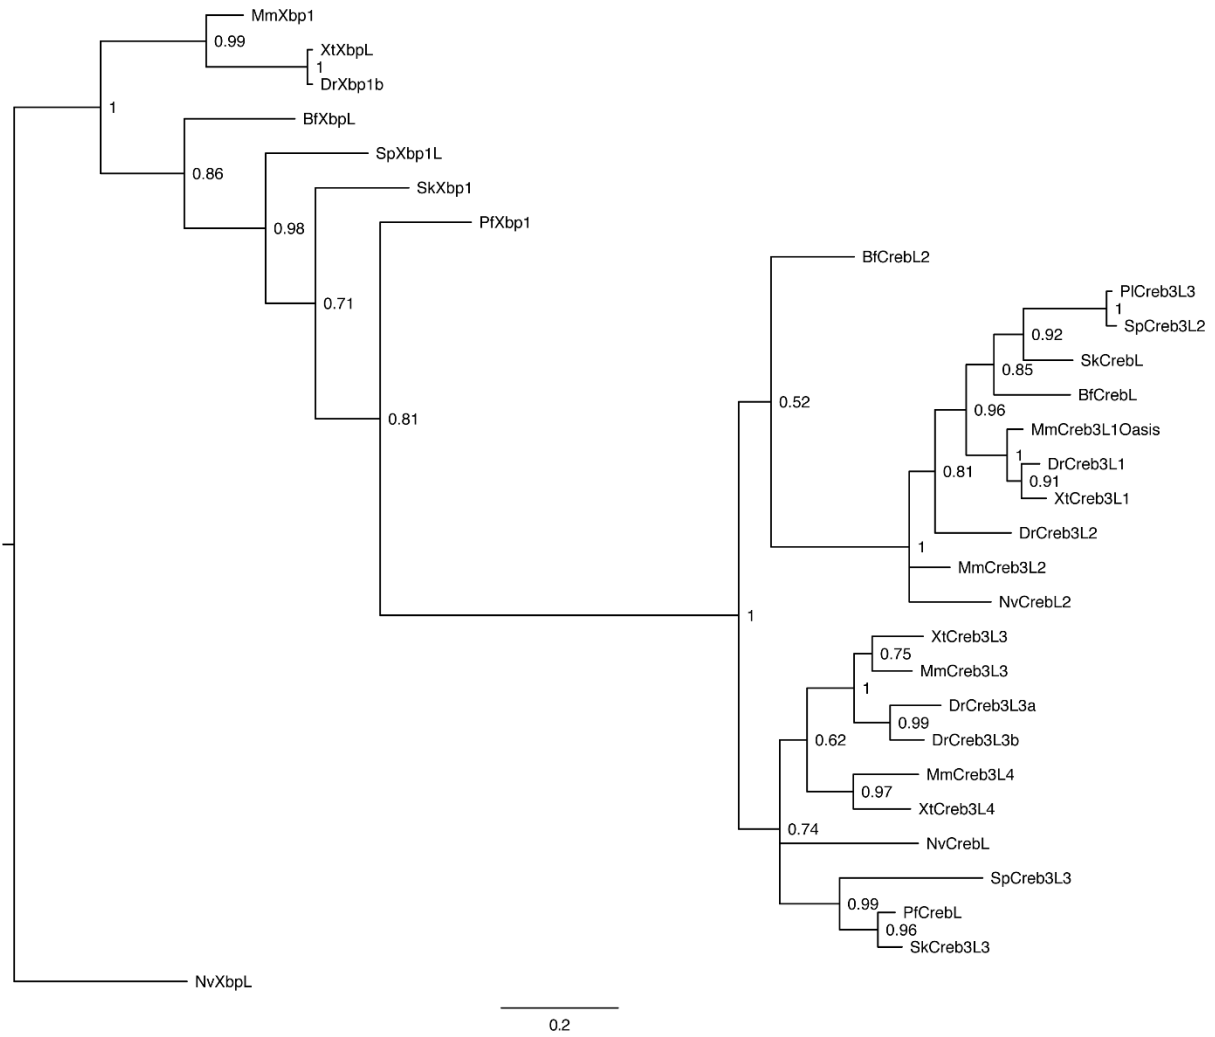

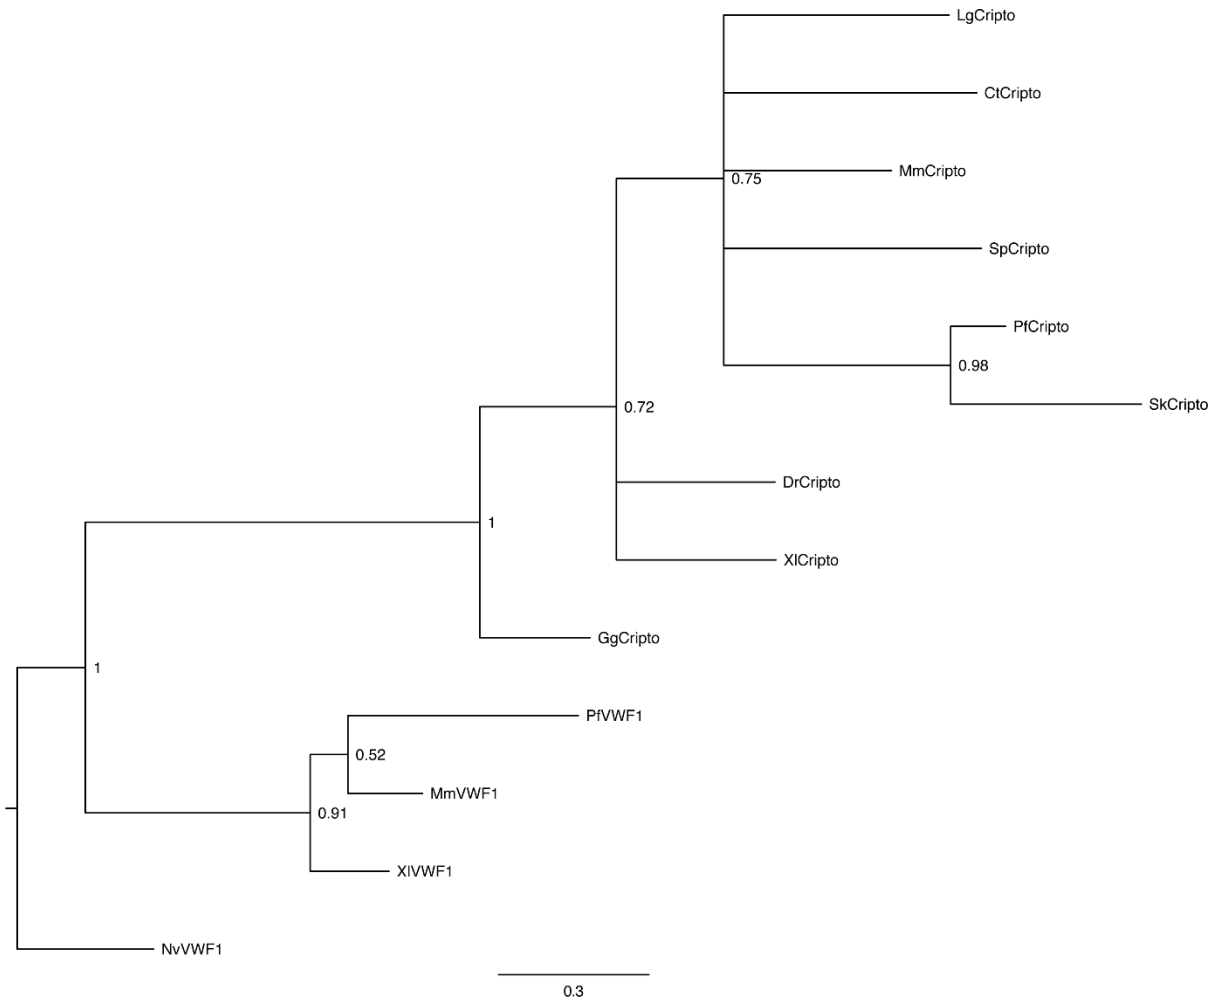

**Figure S1. Phylogenetic analysis of newly identified hemichordate genes.**

Phylogenetic trees were analysed using Bayesian inference of conserved protein domains aligned using MUSCLE. Trees were run through 5 million generations and are based on a “mixed” model of evolution. Domains used in tree construction were identified using SMART protein prediction analysis.

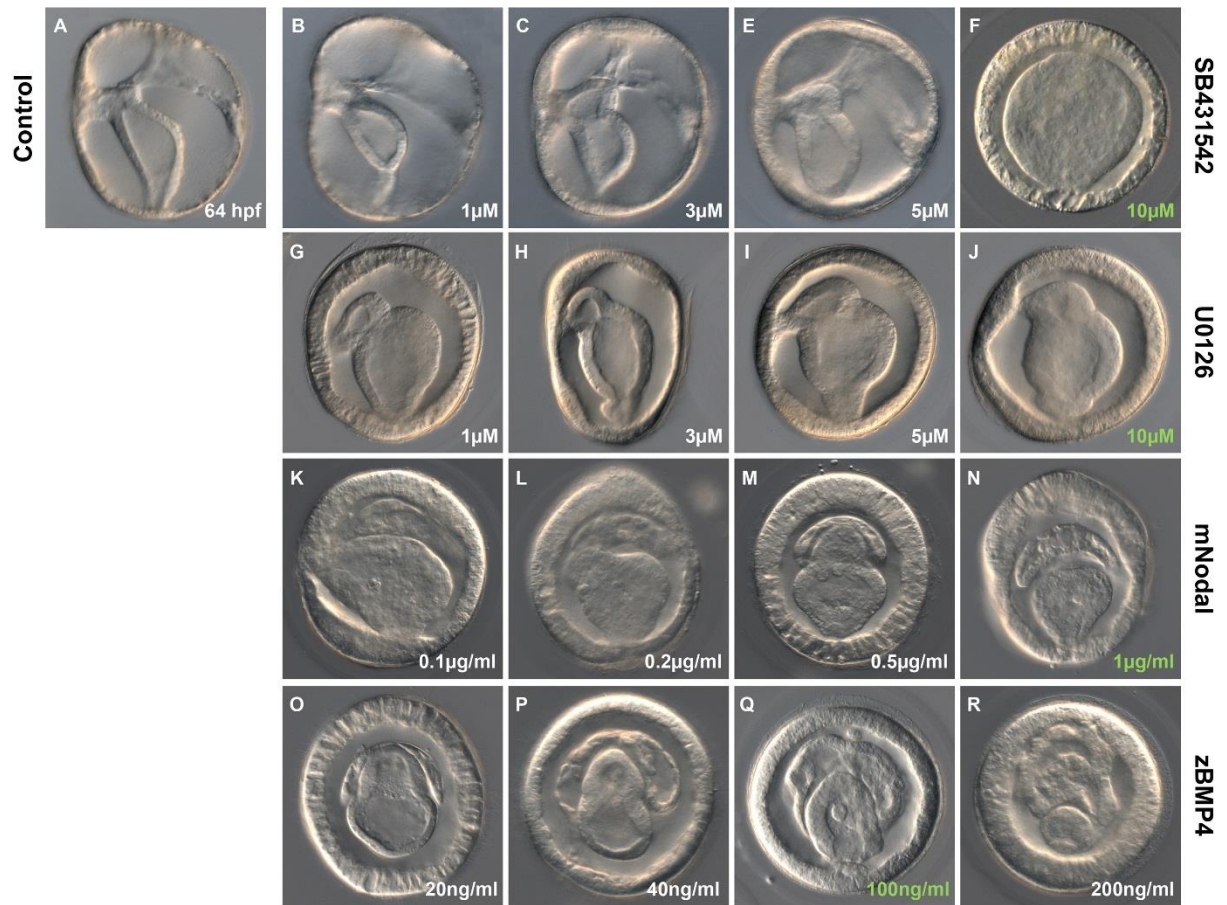

**Figure S2. Dose dependent effects of SB431542, U0126, mNodal and zBmp4 treatments.** Treatments were initiated at the 2-cell stage at various concentrations to determine the most reliable concentration of a given substance. Green indicates the concentration used for the present study.

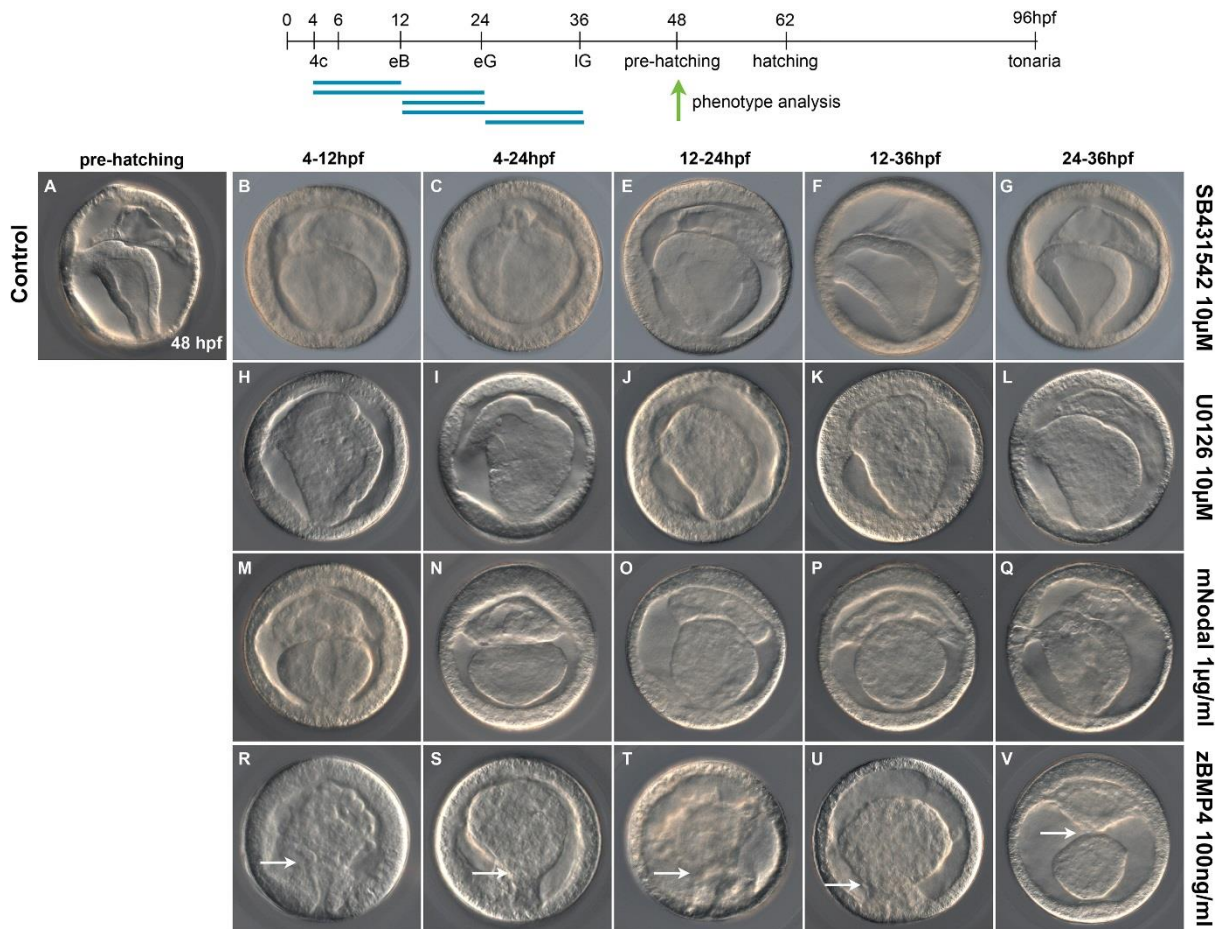

**Figure S3. Drug sensitivity-periods of the various treatments in *P. flava*.** Embryos were incubated with the indicated drug or recombinant protein during the indicated periods of times and scored for phenotypes at pre-hatching embryos. White arrows in R-V indicate the boundary between the endoderm and mesoderm.

***Pf-pitx***

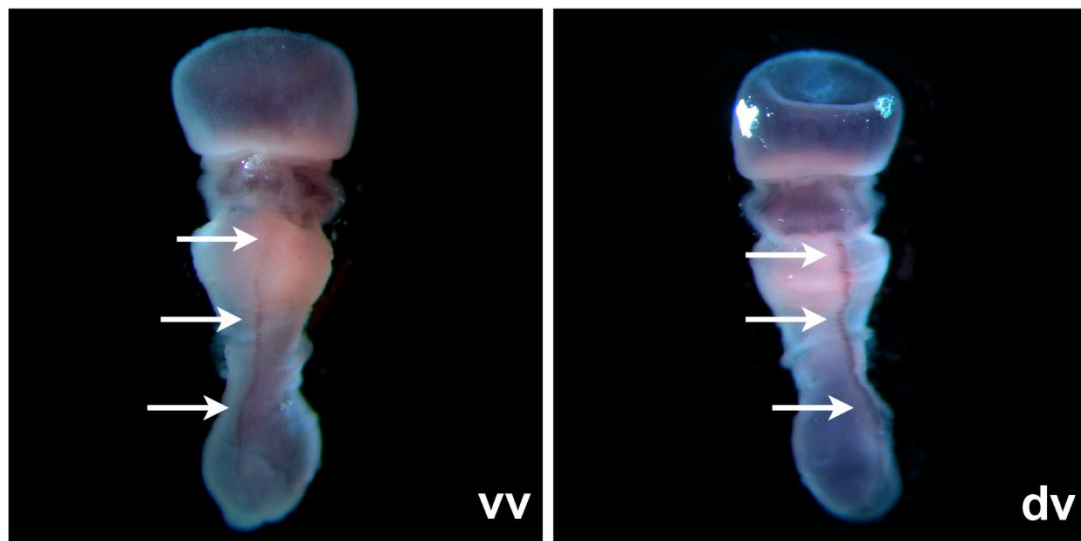

**Figure S4. *Pf-pitx* is expressed in the ventral and dorsal midlines.** WISH using a probe targeted against endogenous *Pf-pitx* transcripts shows that this gene is expressed in the ventral and dorsal midlines in newly metamorphosed juveniles. (dv) dorsal view, (vv) ventral view.

**Table S1. Primers used to clone the full-length *Pf-nodal* gene**

**degenerated NODAL primers:**

Nodal degF1  
5'-GTCTGACTTCRANMARATHGGNTGG-3'  
Nodal degF2  
5'-TAYAAYGCNTAYCGNTGYGARGG-3'  
Nodal degR1  
5'-RCANCCRCAYTCNTCNACDATCAT-3'  
Nodal degR2  
5'-TTCATRTANGCR TGRTTNGTNGG-3'

**NODAL Race primers:**

PfNodal\_3'RACE-Fwd1  
5'-GTCCCTGAACCGTGGAGATTTAGTG-3'  
PfNodal\_3'RACE-Fwd2  
5'-AGGTTTCAGAGAGACCGCCATCATT-3'  
PfNodal\_5'RACE-Rev1  
5'-TTTCCC GCCCTTGACCTTGGTGAAG-3'  
PfNodal\_5'RACE Rev2  
5'-GTTGCCGTTTCTTCGTTTCTTTCCCC-3'

**Full length NODAL primers:**

PfNodal\_FL-FWD  
5'-ATGGTCCTCTGCCCTCTTTGTGTGCG-3'  
PfNodal\_FL REV  
5'-TTATCTGCAACCACATTCTTCCAC-3'
